# Supplementary material for: Changing the spatial pattern of TFL1 expression reveals its key role in the shoot meristem in controlling Arabidopsis flowering architecture
Source: PubMed Central journal article supplement (PMC4507777; doi:10.1093/jxb/erv247), 2015-05-27
Supplement: supp_erv247_jexbot143164_file001.pdf [file supp_erv247_jexbot143164_file001.pdf]

‘Changing the spatial pattern of *TFL1* expression reveals its key role in the shoot meristem to control Arabidopsis flowering architecture’

Kim Baumann<sup>1</sup>, Julien Venail<sup>1</sup>, Ana Berbel<sup>2</sup>, Maria Jose Domenech<sup>2</sup>, Tracy Money<sup>1</sup>, Lucio Conti<sup>2</sup>, Yoshie Hanzawa<sup>1,3</sup>, Francisco Madueno<sup>2</sup>, Desmond Bradley<sup>1</sup>

Supplementary Figure S1. Independent lines show ectopic *TFL1* affects plant organ numbers

The number of rosette leaves (RL), cauline leaves (CL), I1\* structures (shoots without subtending CL or *ap1*-like structures) and flowers (F) made by the main shoot were recorded for wild-type (WT) Arabidopsis or *tfl1-1* mutants containing *pANT::TFL1*, *pLFY::TFL1* or *pAPI::TFL1*. WT plants containing *35S::TFL1* and *ap1-12* mutants were also analysed. Numbers represent the average of 20-55 plants with standard deviations as shown. The solid black bars in (F) in the *tfl1* background represent termination of the main shoot by conversion to a flower.
